# Supplementary material for: Risk Assessment Model for the Renewal of Water Distribution Networks: A Practical Approach
Source: MDPI journal article supplement (doi:10.3390/w15081509), 2023-04-12
Supplement: s1 [file s1]

Archive with 2 entries (2 files):
- File S1_Hydraulic Modeling.pdf
- File S2_Water Quality.pdf
