# Supplementary material for: Risk Assessment Model for the Renewal of Water Distribution Networks: A Practical Approach
Source: MDPI journal article supplement (doi:10.3390/w15081509), 2023-04-12
Supplement: s1 [file s1 › File S1_Hydraulic Modeling.pdf]

## File S1

### A.1. Hydraulic Modeling

Modeling hydraulic systems is a valuable tool for evaluating the behavior of water distribution systems. It involves creating a mathematical or computational representation of the physical and operational characteristics of a system, aimed at identifying and solving problems, as well as providing information for decision-making. Through laws of mass, energy and kinetic reactions conservation, it is possible to create hydraulic and water quality simulation models. However, for the model to be effective as a management and planning tool, it must be calibrated, adjusting its physical, hydraulic and load characteristics, so that its results are realistic and consistent with field observations [1–5].

The hydraulic modeling of the water distribution system that served as a support for the research was carried out using the QGIS, EPANET and QGISRed [6] software. The model allowed georeferencing the system and performing static and dynamic simulations of the hydraulic behavior of the water distribution network. Finally, it was possible to acquire designed parameters (pressure, velocity, flow, length and diameter) in each pipeline of the network. These results were obtained following seven steps presented in Figure A1.

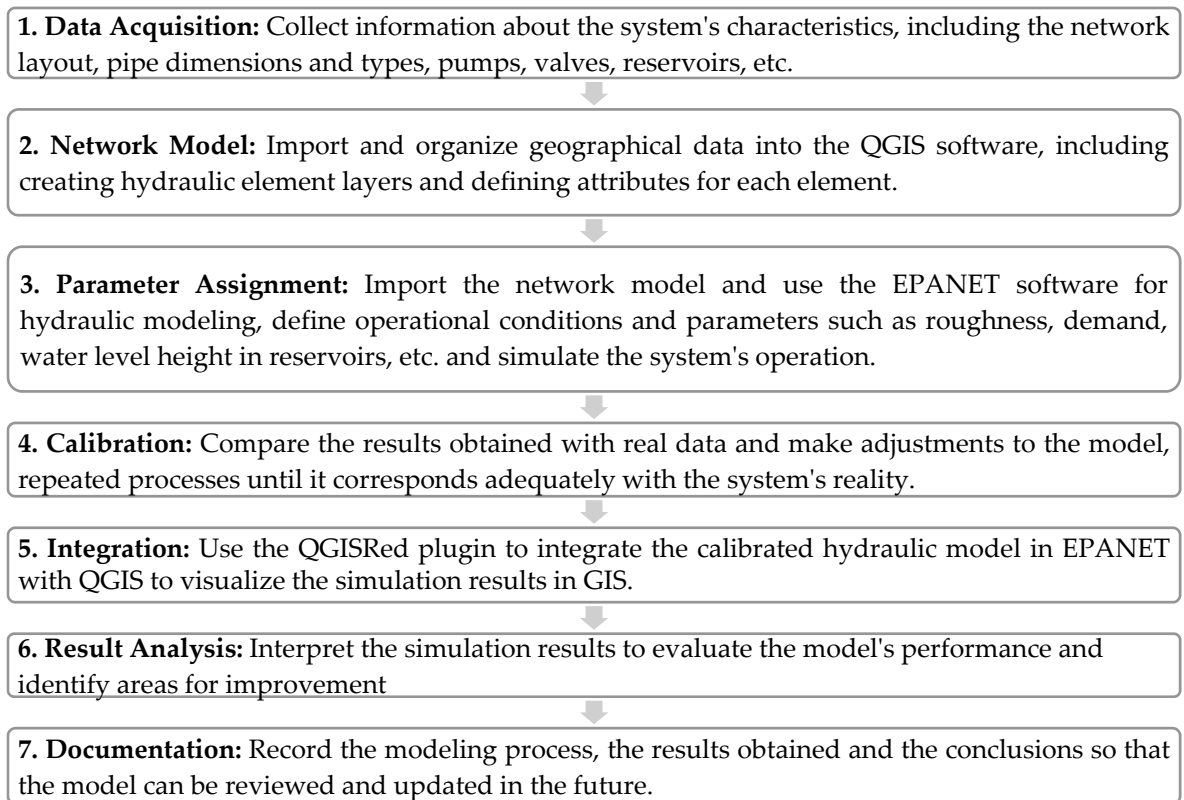

**Figure A1.** Steps for building, simulating, validating and recording the hydraulic model.

#### A.1.1. Data Acquisition

All necessary primary data have been obtained through cooperative efforts between the system operator and the agency responsible for the improvement actions conducted in the distribution network. This collection includes the technical registry of the water distribution system, operational

data and technical information of the works and maintenance conducted in the system. Initially, all this data were processed so that they could be used in this research.

The technical registry was updated, considering the works and maintenance services conducted during the period. These data have been georeferenced and the connectivity problems of the network and the level curves were corrected using the AutoCAD 2021® software, data represented in Figure A2.

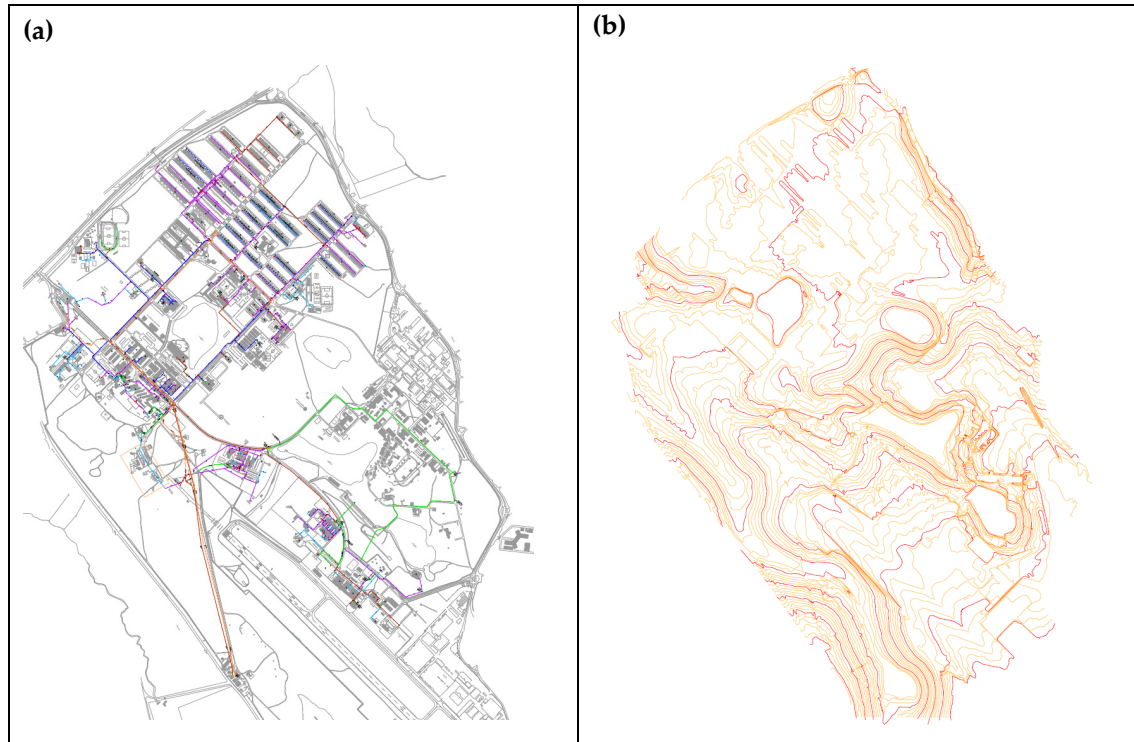

**Figure A2.** CAD files: (a) Updated and georeferenced technical registry; (b) Level curves

The operational data and technical information of various elements of the system, such as reservoirs, valves, pumps, consumption and monitoring points (pressure and flow) were consolidated into a single workbook using Excel 365® software. Some of this information is presented below. It should be noted that undisclosed data are available from the corresponding authors upon reasonable request.

**Table A1.** Information on the storage subsystem of the case study

| Cod. | Type | Shape       | Dimensions          |       | Altitude (m) |        | Water Level (m) |       |       |
|------|------|-------------|---------------------|-------|--------------|--------|-----------------|-------|-------|
|      |      |             | V (m <sup>3</sup> ) | Ø (m) | Base         | Input  | Initial         | Min   | Max   |
| R1   | RNV  | Round       | 150                 | 2.71  | 596.88       | 625.98 | 28.50           | 3.00  | 29.00 |
| R2   | RNV  | Rectangular | 48                  | 4.04  | 598.03       | 613.63 | 15.00           | 11.75 | 15.50 |
| R3   | RNV  | Round       | 60                  | 4.37  | 598.33       | 617.93 | 19.00           | 15.50 | 19.50 |
| R4   | RNV  | Round       | 47                  | 2.19  | 598.68       | 613.28 | 14.00           | 2.00  | 14.50 |
| R5   | RNV  | Round       | 40                  | 2.45  | 600.58       | 611.18 | 10.00           | 2.00  | 10.50 |
| R6   | RNV  | Round       | 66                  | 2.29  | 600.70       | 620.30 | 19.00           | 3.50  | 19.50 |
| R7   | RNV  | Round       | 40                  | 2.45  | 600.91       | 611.51 | 10.00           | 2.00  | 10.50 |
| R8   | RNV  | Round       | 40                  | 2.45  | 602.37       | 612.97 | 10.00           | 2.00  | 10.50 |
| R9   | RNV  | Round       | 10                  | 1.30  | 603.01       | 612.61 | 9.00            | 2.00  | 9.50  |
| R10  | RNV  | Round       | 20                  | 2.74  | 606.21       | 622.51 | 15.00           | 12.81 | 16.20 |

|     |     |             |      |       |        |        |       |       |       |
|-----|-----|-------------|------|-------|--------|--------|-------|-------|-------|
| R11 | RNV | Round       | 242  | 3.60  | 629.36 | 674.78 | 44.00 | 21.57 | 45.32 |
| R12 | RNV | Rectangular | 31   | 1.85  | 620.56 | 635.16 | 14.40 | 3.00  | 14.50 |
| R13 | RNV | Round       | 10   | 1.26  | 626.04 | 635.14 | 8.00  | 1.00  | 9.00  |
| R14 | RNV | Round       | 10   | 1.16  | 626.60 | 638.20 | 11.00 | 2.00  | 11.50 |
| R15 | RNV | Round       | 54   | 2.76  | 626.94 | 626.94 | 26.00 | 18.00 | 27.00 |
| R16 | RNV | Rectangular | 54   | 10.31 | 606.22 | 607.07 | 0.64  | 0.10  | 0.75  |
| R17 | RNF | Rectangular | 2525 | -     | 634.00 | -      | 3.00  | 1.00  | 3.50  |

Some simplifications were necessary to create the hydraulic model due to the lack of some operational data related to micrometers and the level monitoring of reservoirs in low areas. In this simplification, the secondary networks were disregarded and the number of reservoirs was reduced. In this case, the consumption of these customers was considered at the NODE (a graphic element used to represent the junction of various system components, such as pipes, valves, and pumps). It represents the water entry into the variable-level reservoir (RNV) that was removed from the model. The node replaces many consumers, representing, therefore, a region supplied by the same distribution network. The base consumption value assigned at the NODE was informed by the system operator and adjusted based on the volume recorded by the respective region's flow meter, as detailed in Table A2 and represented in Figure A3.

**Table A2.** Base consumption assigned in the water distribution system of the case study.

| Client | Consumption (L/s) |           | Flow Meter | Node  |
|--------|-------------------|-----------|------------|-------|
|        | Measured          | Corrected |            |       |
| 1      | 0.0231            | 0.054     | MM3        | N-127 |
| 2      | 0.0058            | 0.013     | MM3        | N-127 |
| 3      | 0.0208            | 0.048     | MM3        | N-225 |
| 4      | 0.0098            | 0.023     | MM3        | N-81  |
| 5      | 0.0006            | 0.001     | MM3        | N-81  |
| 6      | 0.0017            | 0.004     | MM3        | N-81  |
| 7      | 0.0093            | 0.021     | MM3        | N-81  |
|        | 0.0819            | 0.19      | MM3        | N-81  |
| 9      | 0.0017            | 0.004     | MM3        | N-81  |
| 10     | 0.776             | 1.801     | MM3        | N-466 |
| 11     | 0.0017            | 0.004     | MM3        | N-289 |
| 12     | 0.0009            | 0.002     | MM3        | N-289 |
| 13     | 0.0035            | 0.008     | MM3        | N-36  |
|        | 0.1667            | 0.387     | MM3        | N-36  |
| 15     | 0.0075            | 0.017     | MM3        | N-357 |
|        | 0.1667            | 0.387     | MM3        | N-357 |
| 17     | 0.239             | 0.555     | MM3        | N-318 |
| 18     | 0.0116            | 0.027     | MM3        | N-250 |
| 19     | 0.2188            | 0.508     | MM3        | N-250 |
| 20     | 0.0087            | 0.02      | MM3        | N-250 |
| 21     | 0.0289            | 0.067     | MM3        | N-250 |
| 22     | 0.0388            | 0.09      | MM3        | N-89  |
| 23     | 0.0405            | 0.094     | MM3        | N-69  |
| 24     | 0.0775            | 0.18      | MM3        | N-350 |
| 25     | 0.0168            | 0.039     | MM3        | N-125 |
| 26     | 0.0556            | 0.129     | MM3        | N-57  |

|    |        |       |     |              |
|----|--------|-------|-----|--------------|
|    | 0.0434 | 0.101 | MM3 | N-57         |
| 28 | 0.1053 | 0.244 | MM3 | N-4          |
| 29 | 0.031  | 0.072 | MM3 | N-4          |
| 30 | 0.0101 | 0.023 | MM3 | N-4          |
| 31 | 0.0058 | 0.013 | MM3 | N-4          |
| 32 | 0.0428 | 0.099 | MM3 | N-84         |
| 33 | 0.7205 | 1.672 | MM3 | N-84         |
| 34 | 0.3232 | 0.323 | MM3 | N-85         |
| 35 | 0.0156 | 0.036 | MM3 | N-353        |
| 36 | 0.0289 | 0.067 | MM3 | N-211        |
| 37 | 0.0023 | 0.005 | MM3 | N-5          |
|    | 0.0486 | 0.113 | MM3 | N-5          |
| 39 | 0.3029 | 0.303 | MM3 | N-83         |
| 40 | 0.317  | 0.317 | MM3 | N-82         |
| 41 | 0.4803 | 1.115 | MM3 | N-10 + N-255 |
|    | 0.1372 | 0.318 | MM3 | N-100        |
|    | 0.4109 | 0.953 | MM3 | N-99         |
|    | 0.1105 | 0.256 | MM3 | N-131        |
|    | 0.0683 | 0.158 | MM3 | N-131        |
| 46 | 0.0087 | 0.02  | MM3 | N-16         |
| 47 | 0.0248 | 0.025 | MM3 | N-337        |
| 48 | 0.0006 | 0.001 | MM3 | N-79         |
| 49 | 0.0006 | 0.001 | MM3 | N-79         |
| 50 | 0.0017 | 0.004 | MM3 | N-79         |
| 51 | 0.0515 | 0.12  | MM3 | N-328        |
| 52 | 0.0828 | 0.192 | MM3 | N-110        |
|    | 0.8825 | 2.048 | MM3 | N-110        |
| 54 | 1.0747 | 2.494 | MM3 | N-67         |
|    |        |       |     | N-283        |
|    |        |       |     | N-281        |
| 57 | 0.0642 | 0.149 | MM3 | N-264        |
| 58 | 0.0069 | 0.016 | MM3 | N-104        |
| 59 | 0.0064 | 0.015 | MM3 | N-128        |
| 60 | 0.0156 | 0.036 | MM3 | N-349        |
| 61 | 0.0718 | 0.167 | MM3 | N-194        |
| 62 | 0.0243 | 0.056 | MM3 | N-212        |
| 63 | 0.0046 | 0.011 | MM3 | N-43         |
| 64 | 0.0058 | 0.013 | MM3 | N-41         |
| 65 | 0.0035 | 0.008 | MM3 | N-37         |
| 66 | 0.0023 | 0.005 | MM3 | N-29         |
| 67 | 0.0087 | 0.02  | MM3 | N-31         |
| 68 | 0.0093 | 0.021 | MM3 | N-311        |
| 69 | 0.0064 | 0.015 | MM3 | N-215        |
| 70 | 0.0046 | 0.011 | MM3 | N-231        |
| 71 | 0.0046 | 0.011 | MM3 | N-335        |
| 72 | 0.0359 | 0.083 | MM3 | N-221        |
|    | 0.3125 | 0.725 | MM3 | N-221        |
| 74 | 0.0046 | 0.011 | MM3 | N-144        |

|     |        |       |     |       |
|-----|--------|-------|-----|-------|
| 75  | 0.0069 | 0.016 | MM3 | N-227 |
| 76  | 0.07   | 0.162 | MM3 | N-180 |
|     | 0.026  | 0.06  | MM3 | N-180 |
| 78  | 0.0208 | 0.048 | MM3 | N-209 |
| 79  | 0.0122 | 0.028 | MM3 | N-76  |
| 80  | 0      | 0     | MM3 | N-338 |
| 81  | 0.0116 | 0.027 | MM3 | N-342 |
| 82  | 0      | 0     | MM3 | N-187 |
| 83  | 0.2865 | 0.665 | MM3 | N-366 |
| 84  | 0.2951 | 0.685 | MM3 | N-363 |
| 85  | 0.2604 | 0.604 | MM3 | N-368 |
| 86  | 0.3125 | 0.725 | MM3 | N-385 |
| 87  | 0.2778 | 0.645 | MM3 | N-391 |
| 88  | 0.2778 | 0.645 | MM3 | N-392 |
| 89  | 0.2951 | 0.685 | MM3 | N-382 |
| 90  | 0.2951 | 0.685 | MM3 | N-380 |
| 91  | 0.2951 | 0.685 | MM3 | N-381 |
| 92  | 0.0833 | 0.193 | MM3 | N-157 |
| 93  | 0.0058 | 0.013 | MM3 | N-356 |
| 94  | 0.2865 | 0.665 | MM3 | N-367 |
| 95  | 0.2691 | 0.624 | MM3 | N-360 |
| 96  | 0.2778 | 0.645 | MM3 | N-362 |
| 97  | 0.2778 | 0.645 | MM3 | N-364 |
| 98  | 0.2083 | 0.483 | MM3 | N-365 |
| 99  | 0.2083 | 0.483 | MM3 | N-369 |
| 100 | 0.2083 | 0.483 | MM3 | N-370 |
| 101 | 0.2083 | 0.483 | MM3 | N-372 |
| 102 | 0.1997 | 0.463 | MM3 | N-371 |
| 103 | 0.1389 | 0.322 | MM3 | N-387 |
| 104 | 0.1649 | 0.383 | MM3 | N-377 |
| 105 | 0.0521 | 0.121 | MM3 | N-390 |
| 106 | 0.1215 | 0.282 | MM3 | N-374 |
| 107 | 0.1215 | 0.282 | MM3 | N-388 |
| 108 | 0.1215 | 0.282 | MM3 | N-375 |
| 109 | 0.0955 | 0.222 | MM3 | N-389 |
| 110 | 0.1476 | 0.342 | MM3 | N-373 |
| 111 | 0.2083 | 0.483 | MM3 | N-378 |
| 112 | 0.1128 | 0.262 | MM3 | N-379 |
| 113 | 0.2604 | 0.604 | MM3 | N-386 |
| 114 | 0.0955 | 0.222 | MM3 | N-376 |
| 115 | 0.1042 | 0.242 | MM3 | N-383 |
| 116 | 0.1042 | 0.242 | MM3 | N-384 |
| 117 | 0.2083 | 0.483 | MM3 | N-169 |
| 118 | 0.2083 | 0.483 | MM3 | N-166 |
| 119 | 0.2083 | 0.483 | MM3 | N-158 |
| 120 | 0.1424 | 0.33  | MM3 | N-292 |
| 121 | 0.1136 | 0.114 | MM3 | N-429 |
| 122 | 0.0058 | 0.013 | MM3 | N-306 |

|     |        |       |           |       |
|-----|--------|-------|-----------|-------|
| 123 | 0.0359 | 0.273 | MM5       | N-1   |
| 124 | 0.0231 | 0.176 | MM5       | N-80  |
| 125 | 0.0174 | 0.132 | MM5       | N-359 |
| 126 | 0.0156 | 0.119 | MM5       | N-189 |
| 127 | 0.0029 | 0.022 | MM5       | N-168 |
|     | 0.0014 | 0.011 | MM5       | N-168 |
| 129 | 0.0023 | 0.018 | MM5       | N-252 |
| 130 | 0.0023 | 0.018 | MM5       | N-161 |
| 131 | 0.0689 | 0.524 | MM5       | N-305 |
| 132 | 0.0122 | 0.092 | MM5       | N-324 |
| 133 | 0.0637 | 0.484 | MM5       | N-179 |
| 134 | 0.0255 | 0.194 | MM5       | N-204 |
| 135 | 0.0046 | 0.035 | MM5       | N-358 |
| 136 | 0.0056 | 0.006 | MM5       | N-330 |
| 137 | 0.012  | 0.012 | MM5       | N-330 |
| 138 | 0.0029 | 0.022 | MM5       | N-109 |
| 139 | 0.0058 | 0.044 | MM5       | N-463 |
| 140 | 0.0116 | 0.088 | MM5       | N-243 |
| 141 | 1.2153 | 1.278 | MM2       | N-462 |
| 142 | 0.1713 | 1.167 | MM2 - MM4 | N-132 |

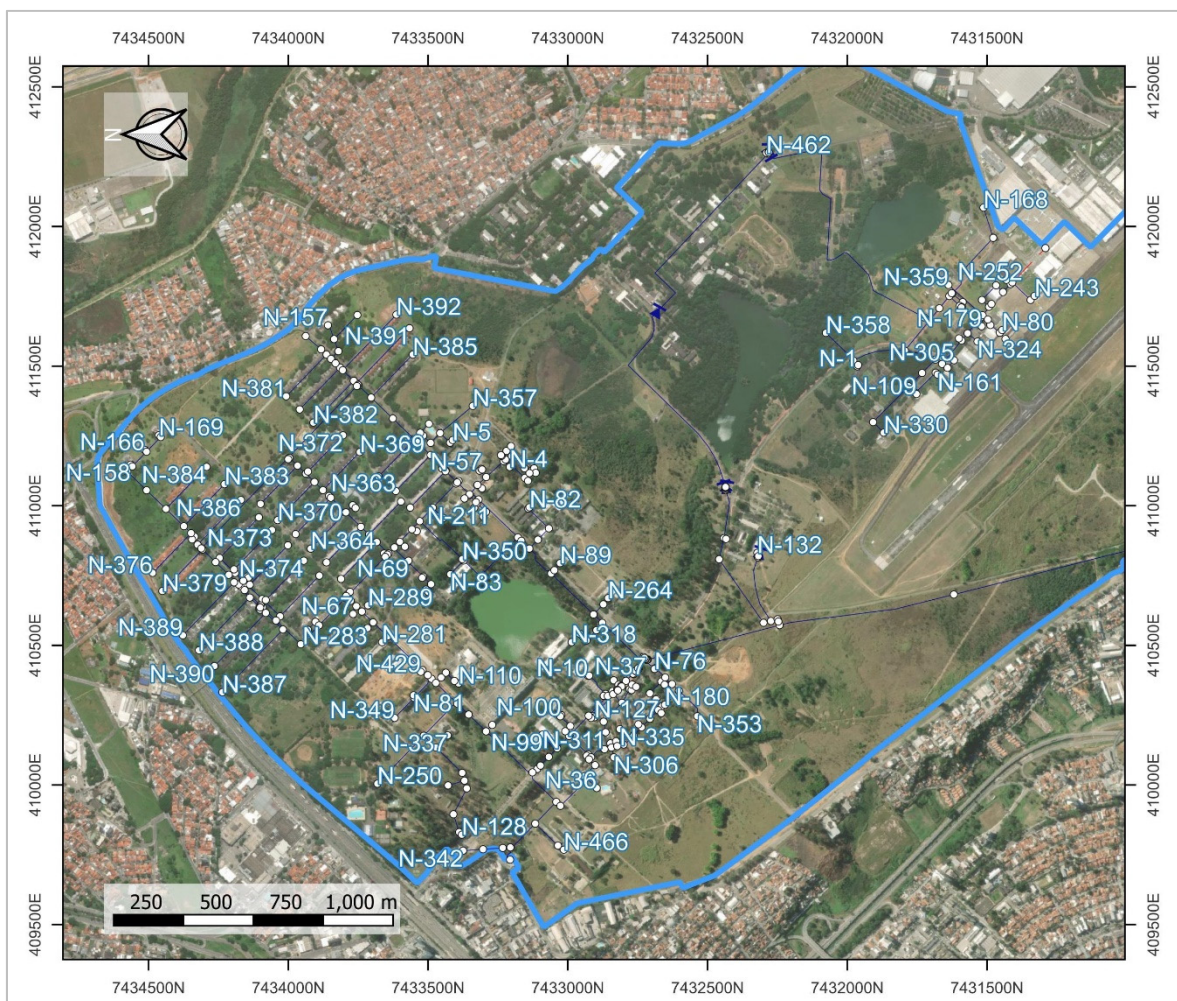

Figure A3. Location of the consumption attributed to the various consumers.

The distribution network in this case study has monitoring technology through an operational control center (CCO) that receives network information (flow and/or pressure) through a telemetry system (Vectorasys) with communication via cell signal (GPRS), indicated locations in Figure A4.

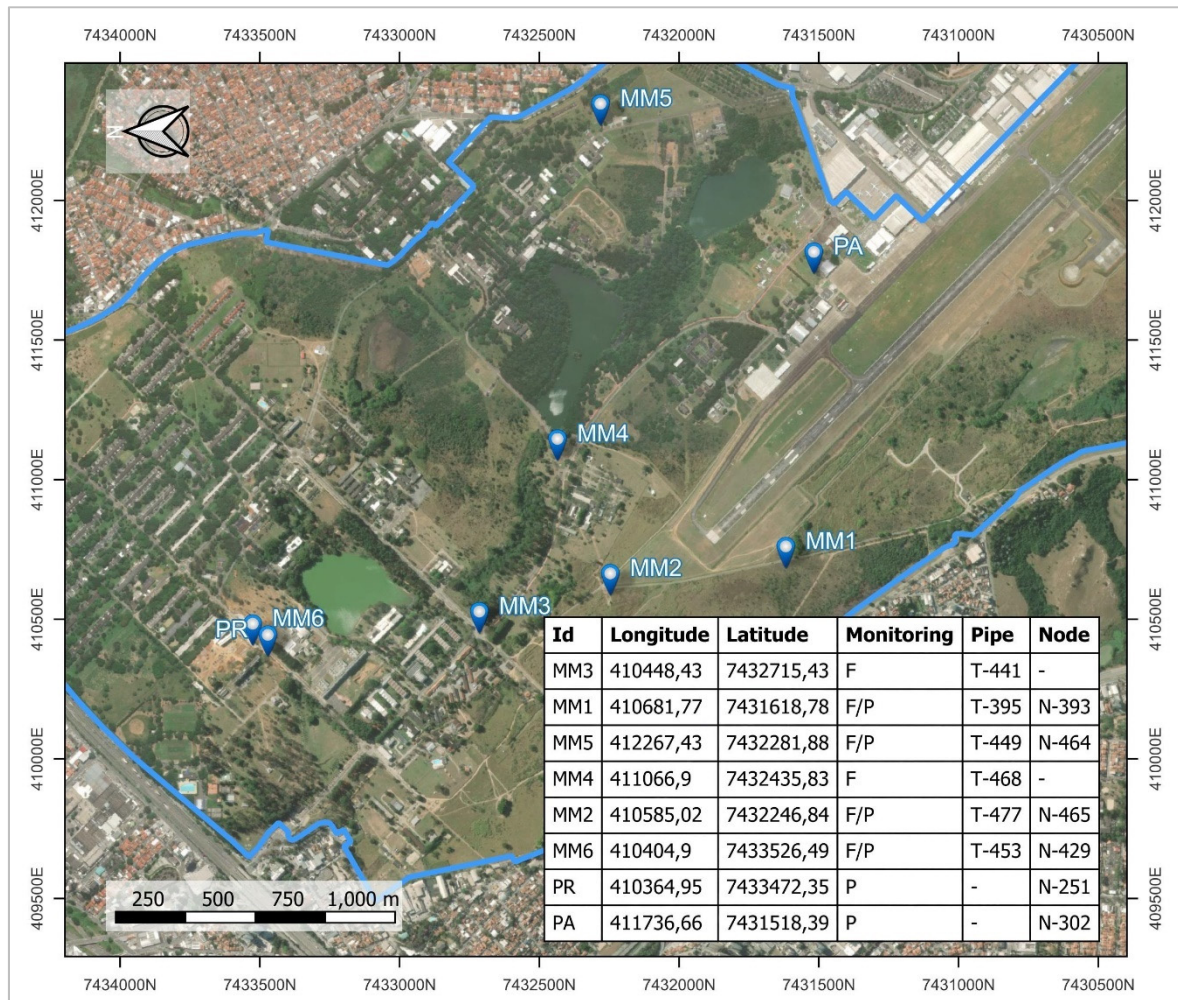

**Figure A4.** Location of the monitoring points in the system, flow (F) and pressure (P) parameters.

The results of this monitoring, after data processing, refer to the hourly average values of the month of August 2021 (working days of the month with the highest consumption), that is, observed real results, flow and pressure parameters, represented in Table A3.

**Table A3.** Control points of the system and respective observed flow (F) and pressure (P) values

| Hour  | MM1    |       | MM2   |       | MM3    |       | MM4   |       | MM5   |       | MM6   |       | PA    | PR    |
|-------|--------|-------|-------|-------|--------|-------|-------|-------|-------|-------|-------|-------|-------|-------|
|       | F      | P     | F     | P     | F      | F     | F     | P     | F     | P     | F     | P     | P     | P     |
|       | [L/s]  | [mwc] | [L/s] | [mwc] | [L/s]  | [L/s] | [L/s] | [mwc] | [L/s] | [mwc] | [L/s] | [mwc] | [mwc] | [mwc] |
| 00:00 | 34.768 | 20.01 | 1.904 | 13.42 | 30.458 | 0.000 | 1.230 | 43.20 | 0.303 | 12.88 | 23.90 | 14.44 |       |       |
| 00:15 | 35.056 | 20.03 | 1.870 | 13.72 | 30.454 | 0.000 | 1.200 | 43.00 | 0.144 | 13.37 | 23.76 | 14.48 |       |       |
| 00:30 | 34.167 | 19.94 | 1.900 | 13.64 | 30.630 | 0.000 | 1.194 | 43.04 | 0.114 | 13.44 | 23.39 | 14.69 |       |       |
| 00:45 | 35.722 | 19.83 | 1.919 | 13.92 | 31.194 | 0.000 | 1.178 | 43.08 | 0.125 | 13.82 | 23.77 | 14.57 |       |       |
| 01:00 | 37.556 | 19.80 | 1.944 | 14.21 | 30.833 | 0.000 | 1.183 | 42.97 | 0.078 | 13.71 | 23.21 | 14.71 |       |       |
| 01:15 | 37.111 | 19.80 | 1.959 | 13.87 | 30.167 | 3.963 | 1.178 | 43.18 | 0.019 | 13.84 | 23.71 | 14.56 |       |       |
| 01:30 | 36.444 | 19.77 | 5.000 | 12.89 | 29.704 | 4.111 | 1.172 | 42.38 | 0.022 | 13.26 | 23.65 | 14.70 |       |       |

|       |        |       |       |       |        |       |       |       |       |       |       |       |
|-------|--------|-------|-------|-------|--------|-------|-------|-------|-------|-------|-------|-------|
| 01:45 | 36.222 | 19.78 | 5.352 | 12.59 | 29.046 | 4.037 | 1.183 | 42.73 | 0.172 | 13.92 | 23.35 | 14.74 |
| 02:00 | 36.000 | 19.70 | 5.378 | 12.56 | 29.704 | 4.074 | 1.172 | 42.64 | 0.014 | 13.91 | 23.54 | 14.66 |
| 02:15 | 36.222 | 19.67 | 5.352 | 12.61 | 29.056 | 4.037 | 1.178 | 42.72 | 0.014 | 14.10 | 23.38 | 14.76 |
| 02:30 | 35.889 | 19.65 | 5.352 | 12.70 | 29.426 | 4.074 | 1.172 | 42.73 | 0.006 | 13.92 | 23.40 | 14.72 |
| 02:45 | 35.889 | 19.63 | 5.344 | 12.63 | 29.324 | 4.037 | 1.183 | 42.90 | 0.006 | 13.52 | 23.38 | 14.98 |
| 03:00 | 36.389 | 19.55 | 5.341 | 12.45 | 29.037 | 4.037 | 1.183 | 42.96 | 0.011 | 14.01 | 23.37 | 14.84 |
| 03:15 | 36.333 | 19.55 | 5.304 | 12.59 | 29.787 | 4.074 | 1.172 | 42.98 | 0.086 | 14.05 | 23.50 | 14.79 |
| 03:30 | 35.778 | 19.56 | 5.337 | 12.73 | 29.676 | 4.037 | 1.167 | 42.92 | 0.022 | 14.14 | 23.41 | 14.94 |
| 03:45 | 35.611 | 19.55 | 5.341 | 12.81 | 28.818 | 4.037 | 1.178 | 42.99 | 0.022 | 14.15 | 23.36 | 14.93 |
| 04:00 | 35.611 | 19.49 | 5.326 | 12.54 | 28.519 | 4.037 | 1.172 | 43.17 | 0.022 | 14.19 | 23.42 | 14.89 |
| 04:15 | 35.500 | 19.50 | 5.311 | 12.35 | 28.431 | 4.037 | 1.200 | 43.09 | 0.008 | 14.22 | 23.37 | 14.98 |
| 04:30 | 35.278 | 19.44 | 5.330 | 13.24 | 28.454 | 4.037 | 1.172 | 43.02 | 0.008 | 14.19 | 23.62 | 14.78 |
| 04:45 | 35.389 | 19.42 | 5.319 | 12.72 | 29.184 | 4.037 | 1.178 | 43.20 | 0.006 | 14.17 | 23.35 | 14.73 |
| 05:00 | 35.667 | 19.38 | 5.293 | 12.38 | 29.361 | 4.037 | 1.178 | 43.25 | 0.006 | 14.11 | 23.62 | 14.83 |
| 05:15 | 35.778 | 19.35 | 5.193 | 12.03 | 29.509 | 4.000 | 1.167 | 43.27 | 0.006 | 18.07 | 23.40 | 19.47 |
| 05:30 | 36.444 | 19.26 | 5.196 | 11.83 | 29.421 | 4.074 | 1.183 | 43.35 | 0.008 | 18.00 | 23.44 | 20.02 |
| 05:45 | 36.611 | 19.26 | 5.174 | 11.92 | 29.880 | 4.037 | 1.172 | 43.10 | 0.008 | 18.59 | 23.47 | 20.08 |
| 06:00 | 36.333 | 19.24 | 5.178 | 11.86 | 30.091 | 4.037 | 1.167 | 43.14 | 0.011 | 17.71 | 23.42 | 20.04 |
| 06:15 | 37.000 | 19.10 | 5.159 | 11.90 | 30.481 | 4.037 | 1.172 | 43.11 | 0.083 | 18.52 | 23.50 | 19.82 |
| 06:30 | 38.000 | 19.02 | 5.156 | 11.82 | 31.315 | 4.037 | 1.189 | 43.23 | 0.086 | 18.03 | 23.28 | 19.31 |
| 06:45 | 39.000 | 19.01 | 5.159 | 11.64 | 32.306 | 4.000 | 1.300 | 43.08 | 0.086 | 17.13 | 23.33 | 19.33 |
| 07:00 | 39.278 | 18.95 | 5.122 | 11.59 | 33.157 | 4.111 | 1.285 | 42.95 | 0.086 | 17.67 | 23.39 | 19.46 |
| 07:15 | 40.778 | 18.95 | 5.070 | 11.25 | 34.009 | 4.000 | 1.781 | 43.17 | 0.022 | 16.81 | 22.97 | 19.25 |
| 07:30 | 41.278 | 18.92 | 5.026 | 11.09 | 34.944 | 4.111 | 1.963 | 43.03 | 0.142 | 18.00 | 23.26 | 18.90 |
| 07:45 | 41.500 | 18.82 | 5.015 | 11.22 | 35.685 | 4.037 | 1.489 | 43.17 | 0.189 | 16.66 | 23.04 | 19.56 |
| 08:00 | 42.111 | 18.96 | 5.052 | 11.20 | 35.343 | 4.074 | 1.511 | 43.20 | 0.222 | 17.09 | 22.79 | 19.68 |
| 08:15 | 42.500 | 18.84 | 5.059 | 11.44 | 35.731 | 4.037 | 1.507 | 43.07 | 0.100 | 16.82 | 22.80 | 19.66 |
| 08:30 | 42.556 | 18.95 | 5.044 | 11.24 | 36.259 | 4.074 | 2.353 | 42.96 | 0.106 | 16.80 | 22.38 | 19.65 |
| 08:45 | 42.944 | 18.96 | 5.030 | 11.30 | 37.139 | 4.037 | 2.706 | 42.94 | 0.072 | 16.75 | 22.65 | 19.60 |
| 09:00 | 43.333 | 18.95 | 5.044 | 11.30 | 37.333 | 4.074 | 2.856 | 42.85 | 0.067 | 16.59 | 21.30 | 20.07 |
| 09:15 | 42.778 | 19.12 | 5.044 | 11.05 | 36.977 | 4.037 | 2.889 | 42.67 | 0.175 | 16.48 | 22.55 | 19.23 |
| 09:30 | 42.611 | 18.97 | 5.041 | 11.12 | 37.204 | 4.074 | 2.989 | 42.79 | 0.189 | 16.96 | 22.15 | 20.03 |
| 09:45 | 44.611 | 18.83 | 5.026 | 11.16 | 38.093 | 4.074 | 2.814 | 42.80 | 0.161 | 16.98 | 22.09 | 19.99 |
| 10:00 | 46.000 | 18.88 | 5.022 | 11.30 | 38.611 | 4.111 | 2.953 | 42.77 | 0.222 | 17.05 | 22.02 | 20.12 |
| 10:15 | 46.278 | 18.92 | 5.004 | 10.86 | 38.778 | 4.000 | 3.617 | 42.83 | 0.125 | 16.76 | 21.99 | 20.30 |
| 10:30 | 45.222 | 18.93 | 4.974 | 11.02 | 38.565 | 4.074 | 4.078 | 42.86 | 0.131 | 16.99 | 21.88 | 20.32 |
| 10:45 | 44.722 | 19.05 | 4.996 | 11.15 | 39.278 | 4.111 | 4.215 | 42.89 | 0.219 | 17.07 | 21.85 | 20.17 |
| 11:00 | 44.778 | 19.02 | 5.007 | 11.01 | 39.343 | 4.037 | 4.185 | 42.96 | 0.242 | 16.54 | 22.08 | 19.44 |
| 11:15 | 46.056 | 19.04 | 5.044 | 11.29 | 39.815 | 4.074 | 4.174 | 42.88 | 0.333 | 16.64 | 22.03 | 19.52 |
| 11:30 | 46.444 | 19.01 | 5.052 | 11.33 | 39.889 | 4.074 | 4.156 | 42.85 | 0.197 | 16.81 | 22.12 | 19.64 |
| 11:45 | 46.278 | 19.23 | 5.074 | 11.17 | 39.880 | 4.111 | 4.119 | 43.03 | 0.219 | 16.55 | 22.32 | 19.62 |
| 12:00 | 45.500 | 19.20 | 5.056 | 11.45 | 39.231 | 4.074 | 4.552 | 43.22 | 0.192 | 16.54 | 22.23 | 19.68 |
| 12:15 | 42.333 | 19.31 | 5.078 | 11.38 | 39.741 | 4.037 | 4.567 | 42.91 | 0.175 | 16.68 | 21.89 | 20.19 |
| 12:30 | 43.556 | 19.29 | 5.063 | 11.28 | 40.139 | 4.111 | 4.500 | 42.71 | 0.069 | 17.31 | 22.23 | 20.05 |
| 12:45 | 43.778 | 19.37 | 5.052 | 11.26 | 40.472 | 4.037 | 4.426 | 42.67 | 0.056 | 18.38 | 22.36 | 19.87 |
| 13:00 | 43.833 | 19.33 | 5.041 | 11.33 | 40.065 | 4.074 | 4.333 | 43.07 | 0.044 | 17.80 | 21.89 | 19.85 |
| 13:15 | 42.500 | 19.46 | 5.063 | 11.26 | 39.546 | 4.037 | 4.096 | 43.20 | 0.092 | 17.96 | 22.11 | 19.72 |

|             |              |              |             |              |              |             |             |              |             |              |              |              |
|-------------|--------------|--------------|-------------|--------------|--------------|-------------|-------------|--------------|-------------|--------------|--------------|--------------|
| 13:30       | 41.389       | 19.79        | 5.074       | 11.36        | 39.657       | 4.111       | 3.848       | 43.26        | 0.200       | 17.88        | 22.19        | 19.95        |
| 13:45       | 41.444       | 19.75        | 5.081       | 11.50        | 39.389       | 4.000       | 3.844       | 43.32        | 0.150       | 17.97        | 21.75        | 20.64        |
| 14:00       | 41.944       | 19.52        | 5.081       | 11.53        | 39.889       | 4.074       | 3.915       | 43.37        | 0.061       | 18.21        | 21.52        | 20.60        |
| 14:15       | 42.167       | 19.65        | 5.096       | 11.64        | 39.926       | 4.074       | 4.189       | 43.32        | 0.081       | 18.83        | 21.87        | 20.74        |
| 14:30       | 42.500       | 19.74        | 5.115       | 11.56        | 39.444       | 4.037       | 4.315       | 43.59        | 0.078       | 18.98        | 21.87        | 20.49        |
| 14:45       | 42.167       | 19.78        | 5.130       | 11.63        | 37.556       | 4.074       | 4.263       | 43.60        | 0.083       | 18.07        | 21.88        | 20.13        |
| 15:00       | 41.222       | 20.02        | 5.144       | 11.69        | 37.556       | 4.074       | 4.263       | 43.82        | 0.153       | 19.12        | 22.13        | 20.59        |
| 15:15       | 40.944       | 20.01        | 5.178       | 11.87        | 37.694       | 4.037       | 4.033       | 44.24        | 0.153       | 18.47        | 21.83        | 20.79        |
| 15:30       | 41.722       | 20.09        | 5.174       | 12.03        | 37.935       | 4.074       | 3.881       | 43.90        | 0.281       | 18.73        | 22.13        | 21.25        |
| 15:45       | 41.278       | 20.05        | 5.185       | 11.81        | 38.315       | 4.074       | 3.837       | 43.86        | 0.369       | 19.07        | 21.96        | 21.02        |
| 16:00       | 40.611       | 20.30        | 5.185       | 12.04        | 38.185       | 4.037       | 3.956       | 44.11        | 0.072       | 19.18        | 22.03        | 21.21        |
| 16:15       | 40.444       | 20.17        | 5.204       | 11.89        | 37.583       | 4.074       | 4.522       | 44.17        | 0.025       | 20.07        | 22.14        | 21.61        |
| 16:30       | 41.444       | 20.29        | 5.230       | 12.18        | 37.769       | 4.037       | 4.578       | 44.03        | 0.058       | 19.72        | 22.81        | 20.07        |
| 16:45       | 40.667       | 20.19        | 5.219       | 11.97        | 36.676       | 4.074       | 4.489       | 44.10        | 0.169       | 19.62        | 22.58        | 20.51        |
| 17:00       | 40.111       | 20.35        | 5.233       | 11.95        | 35.833       | 4.037       | 4.250       | 44.05        | 0.275       | 19.78        | 22.92        | 20.66        |
| 17:15       | 36.056       | 20.40        | 5.196       | 11.98        | 36.250       | 4.111       | 3.639       | 44.03        | 0.042       | 19.35        | 22.91        | 20.47        |
| 17:30       | 40.389       | 20.48        | 5.222       | 12.08        | 36.935       | 4.037       | 2.363       | 44.14        | 0.047       | 19.72        | 22.46        | 20.21        |
| 17:45       | 40.722       | 20.23        | 5.241       | 12.27        | 37.231       | 4.037       | 1.537       | 44.01        | 0.167       | 20.28        | 22.84        | 20.27        |
| 18:00       | 41.778       | 20.18        | 5.244       | 12.26        | 37.056       | 4.074       | 1.317       | 44.19        | 0.186       | 18.73        | 22.65        | 20.43        |
| 18:15       | 41.333       | 20.37        | 5.263       | 12.44        | 37.167       | 4.000       | 1.306       | 44.19        | 0.183       | 19.44        | 22.93        | 20.11        |
| 18:30       | 40.667       | 20.33        | 5.263       | 12.40        | 37.288       | 4.000       | 1.259       | 44.06        | 0.256       | 19.74        | 22.87        | 20.11        |
| 18:45       | 39.722       | 20.43        | 5.259       | 12.51        | 36.148       | 4.111       | 1.244       | 44.16        | 0.153       | 20.33        | 20.91        | 20.15        |
| 19:00       | 39.611       | 20.40        | 5.263       | 12.28        | 37.056       | 4.000       | 1.256       | 44.09        | 0.083       | 19.51        | 19.95        | 20.09        |
| 19:15       | 39.500       | 20.40        | 5.237       | 12.21        | 37.306       | 4.037       | 1.270       | 43.81        | 0.183       | 19.72        | 21.22        | 20.19        |
| 19:30       | 39.278       | 20.40        | 5.248       | 12.38        | 36.824       | 4.074       | 1.178       | 43.82        | 0.050       | 19.53        | 21.21        | 20.39        |
| 19:45       | 39.167       | 20.39        | 5.267       | 12.31        | 36.278       | 4.000       | 1.152       | 43.93        | 0.050       | 18.54        | 20.99        | 20.24        |
| 20:00       | 40.056       | 20.35        | 5.263       | 12.29        | 36.287       | 4.074       | 1.300       | 43.79        | 0.050       | 18.98        | 21.55        | 20.24        |
| 20:15       | 39.944       | 20.21        | 5.252       | 12.34        | 36.130       | 4.037       | 1.272       | 43.83        | 0.253       | 18.05        | 21.28        | 20.16        |
| 20:30       | 40.222       | 20.23        | 5.252       | 12.34        | 36.102       | 4.037       | 1.256       | 43.73        | 0.147       | 17.90        | 21.27        | 20.28        |
| 20:45       | 39.944       | 20.21        | 5.244       | 12.26        | 35.731       | 4.037       | 1.256       | 44.04        | 0.119       | 17.50        | 20.81        | 20.30        |
| 21:00       | 39.389       | 20.24        | 5.252       | 12.27        | 35.454       | 4.037       | 1.239       | 43.76        | 0.175       | 17.44        | 21.21        | 20.40        |
| 21:15       | 39.389       | 20.14        | 5.226       | 12.16        | 35.370       | 4.037       | 1.456       | 43.79        | 0.067       | 17.88        | 21.61        | 20.35        |
| 21:30       | 38.778       | 20.27        | 5.215       | 12.16        | 35.398       | 4.037       | 1.472       | 43.84        | 0.044       | 17.78        | 21.35        | 20.35        |
| 21:45       | 38.222       | 20.19        | 5.215       | 12.26        | 35.241       | 4.037       | 1.372       | 44.05        | 0.067       | 18.22        | 21.67        | 20.14        |
| 22:00       | 37.722       | 20.20        | 5.241       | 12.22        | 34.935       | 4.074       | 1.283       | 43.69        | 0.164       | 18.61        | 21.70        | 20.49        |
| 22:15       | 37.611       | 20.07        | 2.141       | 13.30        | 34.565       | 0.000       | 1.239       | 43.71        | 0.100       | 18.15        | 21.13        | 15.54        |
| 22:30       | 37.111       | 20.08        | 1.863       | 13.30        | 34.460       | 0.000       | 1.228       | 43.71        | 0.067       | 16.47        | 21.69        | 14.61        |
| 22:45       | 36.611       | 20.16        | 1.874       | 13.36        | 33.120       | 0.000       | 1.239       | 43.66        | 0.111       | 14.24        | 21.50        | 14.34        |
| 23:00       | 35.556       | 20.18        | 1.567       | 13.60        | 33.630       | 0.000       | 1.278       | 43.66        | 0.172       | 13.42        | 20.82        | 14.71        |
| 23:15       | 32.333       | 20.25        | 1.467       | 14.00        | 32.742       | 0.000       | 1.272       | 43.53        | 0.125       | 13.16        | 21.48        | 14.69        |
| 23:30       | 32.111       | 20.38        | 1.456       | 14.22        | 31.165       | 0.000       | 1.272       | 43.47        | 0.175       | 13.22        | 21.96        | 14.71        |
| 23:45       | 31.500       | 20.26        | 1.433       | 14.21        | 30.437       | 0.000       | 1.256       | 43.29        | 0.119       | 13.23        | 20.73        | 14.70        |
| 00:00       | 34.77        | 20.01        | 1.90        | 13.42        | 30.46        | 0.00        | 1.23        | 43.20        | 0.30        | 12.88        | 23.90        | 14.44        |
| <b>Avg.</b> | <b>39.58</b> | <b>19.68</b> | <b>4.71</b> | <b>12.14</b> | <b>34.89</b> | <b>3.55</b> | <b>2.27</b> | <b>43.35</b> | <b>0.11</b> | <b>16.90</b> | <b>22.42</b> | <b>18.54</b> |

The results from Table A3 were used to define the consumption characteristics of the region, the hourly flow coefficient of variation (k2), which generally represent the shape and quantitative

distribution of the flows to be applied at each node identified in Tab. A2, these consumption patterns are represented in Figure A5.

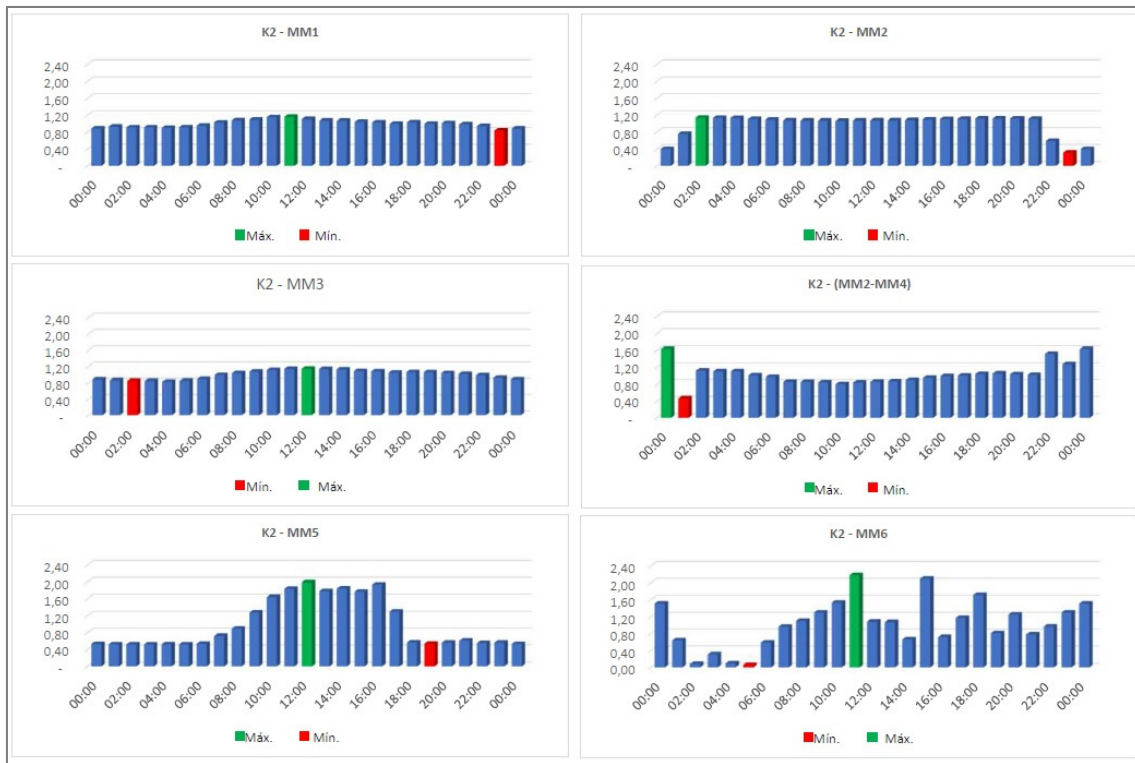

**Figure A5.** Consumption Pattern - Hourly flow coefficient (k2)

#### A.1.2. Network Model

The data and information produced previously were imported and organized in QGIS, including the creation of hydraulic element layers and the definition of attributes for each element of the distribution system (pipes, reservoirs, valves, pumps, etc.). In addition, a digital elevation model (DEM) was produced from the "elevation contours" vector layer in order to extract the elevation data of the nodes in the network model. With these layers produced and the use of the QGISRed plugin, the network model, represented in Figure A6, could be exported (INP file) for hydraulic modeling in EPANET.

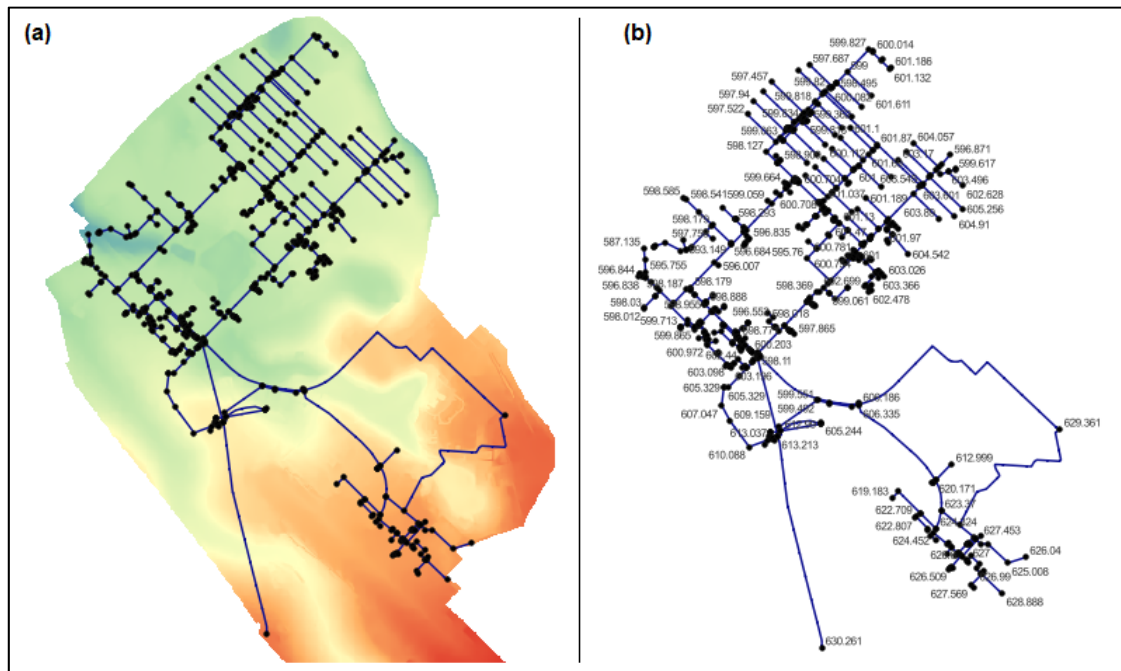

**Figure A6.** Building the Network Model: (a) Tracing and DEM; (b) Network Model

#### A.1.3. Parameter Assignment

The produced network model (INP file) was imported into EPANET, where hydraulic, mechanical and operational parameters were assigned to each element of the network. It allowed to represent the water distribution system and to perform hydraulic simulations, as presented in Table A4.

**Table A4.** Assignment of parameters for hydraulic model simulation

| Component                      | <sup>1</sup> Parameters                  |
|--------------------------------|------------------------------------------|
| Pipe                           | Length (m)                               |
|                                | Diameter (mm)                            |
|                                | Hazen-Williams Roughness Coefficient (C) |
| Node                           | Altitude (m)                             |
|                                | Consumption (L/s)                        |
| Variable Level Reservoir (RNV) | Altitude (m)                             |
|                                | Initial water level (m)                  |
|                                | Minimum water level (m)                  |
|                                | Maximum water level (m)                  |
| Fixed Level Reservoir (RNF)    | Reservoir diameter (m)                   |
|                                | Water Level                              |
| Valve                          | Initial and final nodes (Id)             |
|                                | Diameter (m)                             |
|                                | Valve control parameter (F, P...)        |
|                                | State (Open / Closed / Active)           |
|                                | Type                                     |
| Pump                           | Pump Curve                               |

#### A.1.4. Calibration

The calibration of the hydraulic model was conducted adjusting the value of the roughness coefficient and demand at the nodes. In addition, it was necessary to insert and edit the controls on the valves to represent the operational characteristics of the system until they were in accordance with the reality of the system. This step was essential to adjust the parameters of the model in a way that minimizes deviations between observed and simulated values.

The results of the hydraulic model calibration, observed "versus" simulated results (flow and pressure parameters), were summarized in Tables A5, A6, and in Figure A7, which reflects a 24-hour period with a 15-minute interval between each value.

**Table A5.** Statistical Treatment of Calibration Results for Flow

| Location       | Segment | N° Obs.    | Daily Average Flow (L/s) |              | Mean Error (L/s) | Sd (L/s)     |
|----------------|---------|------------|--------------------------|--------------|------------------|--------------|
|                |         |            | Observed                 | Simulated    |                  |              |
| MM1            | T-395   | 96         | 39.58                    | 39.63        | 1.68             | 1.949        |
| MM2            | T-477   | 96         | 4.71                     | 4.72         | 0.073            | 0.091        |
| MM3            | T-441   | 96         | 34.89                    | 34.9         | 0.437            | 0.577        |
| MM4            | T-468   | 96         | 3.55                     | 3.54         | 0.024            | 0.03         |
| MM5            | T-449   | 96         | 2.27                     | 2.23         | 0.094            | 0.21         |
| MM6            | T-453   | 96         | 0.11                     | 0.11         | 0.041            | 0.053        |
| <b>Network</b> |         | <b>576</b> | <b>14,19</b>             | <b>14.19</b> | <b>0.392</b>     | <b>0.835</b> |

**Table A6.** Statistical Treatment of Calibration Results for Pressure

| Location       | Node  | N° Obs.    | Daily Average Pressure (m.w.c) |              | Mean Error (m.w.c) | Sd (m.w.c)   |
|----------------|-------|------------|--------------------------------|--------------|--------------------|--------------|
|                |       |            | Observed                       | Simulated    |                    |              |
| MM1            | N-393 | 96         | 19.68                          | 19.54        | 0.508              | 0.587        |
| MM2            | N-465 | 96         | 12.14                          | 12.44        | 0.471              | 0.59         |
| MM5            | N-464 | 96         | 43.35                          | 43.45        | 1.345              | 1.564        |
| MM6            | N-429 | 96         | 16.90                          | 17.39        | 1.078              | 1.408        |
| PR             | N-251 | 93         | 18.60                          | 18.50        | 0.61               | 0.86         |
| PA             | N-302 | 96         | 22.42                          | 21.59        | 0.944              | 1.066        |
| <b>Network</b> |       | <b>573</b> | <b>22,20</b>                   | <b>22.17</b> | <b>0.827</b>       | <b>1.081</b> |

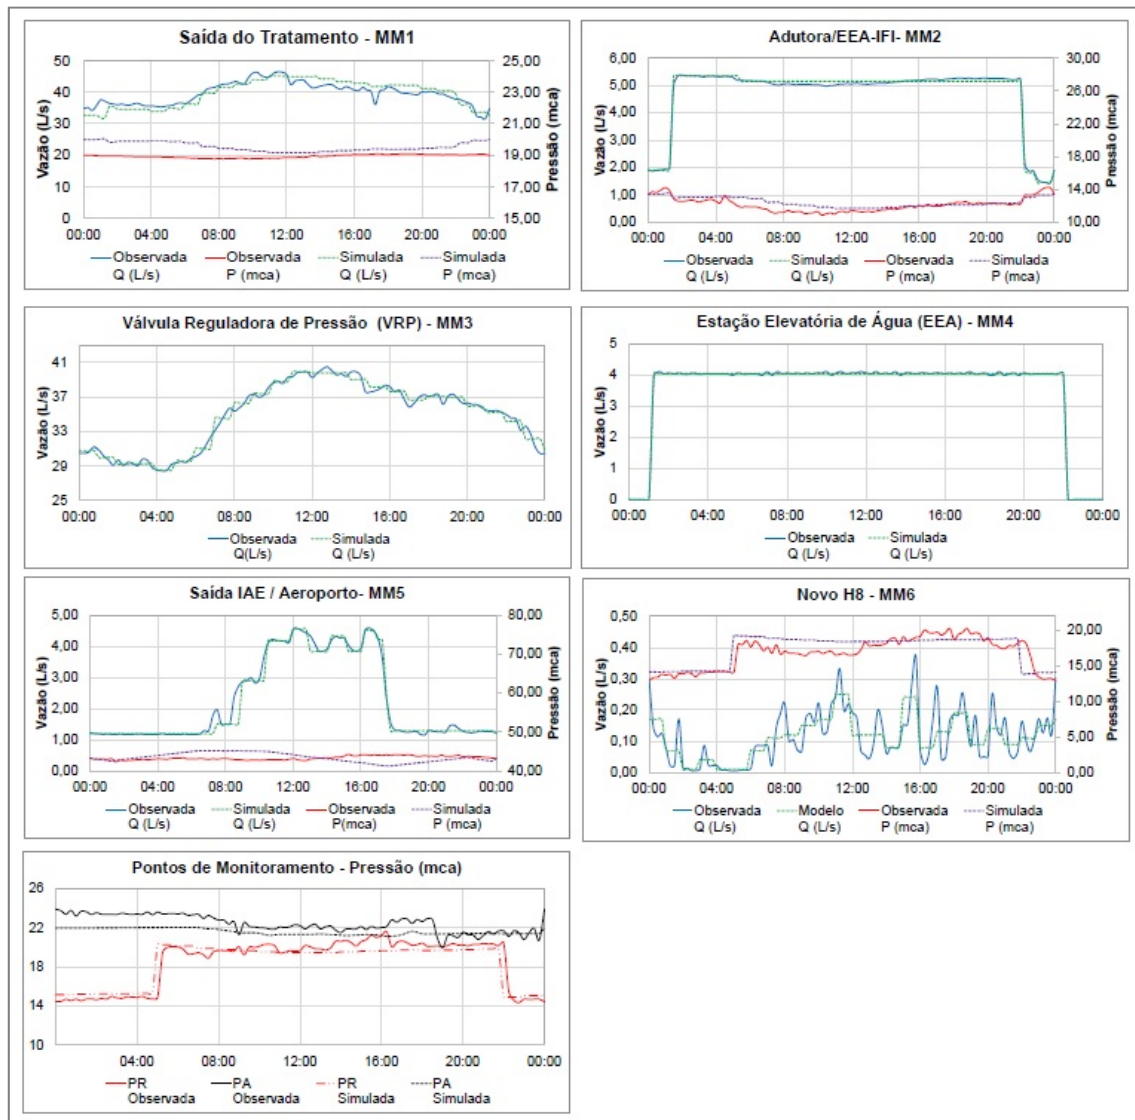

**Figure A7.** Calibration Results of the Hydraulic Model, Flow and Pressure Parameters.

#### A.1.5. Integration

The QGISRed plugin was employed to integrate the calibrated hydraulic model in EPANET with the QGIS software. It made it possible to take advantage of its functionalities and promote communication between both programs through the conversion of .INP files. This way, it is possible to visualize and examine the results of the hydraulic simulation in the GIS. By combining hydraulic and mechanical information with other relevant data such as water quality and pipeline replacement cost, a database could be established for the application of the risk assessment model proposed in the research.

A dynamic simulation of the integrated hydraulic model, followed by a simple field calculation in the attribute table of the respective vector layer, was performed to determine the minimum and maximum value of the hydraulic parameters in each pipeline segment. As an example of the use of the tools, the integrated hydraulic model to QGIS with the simulated flow and pressure results at 12 pm were presented in Figure A8.

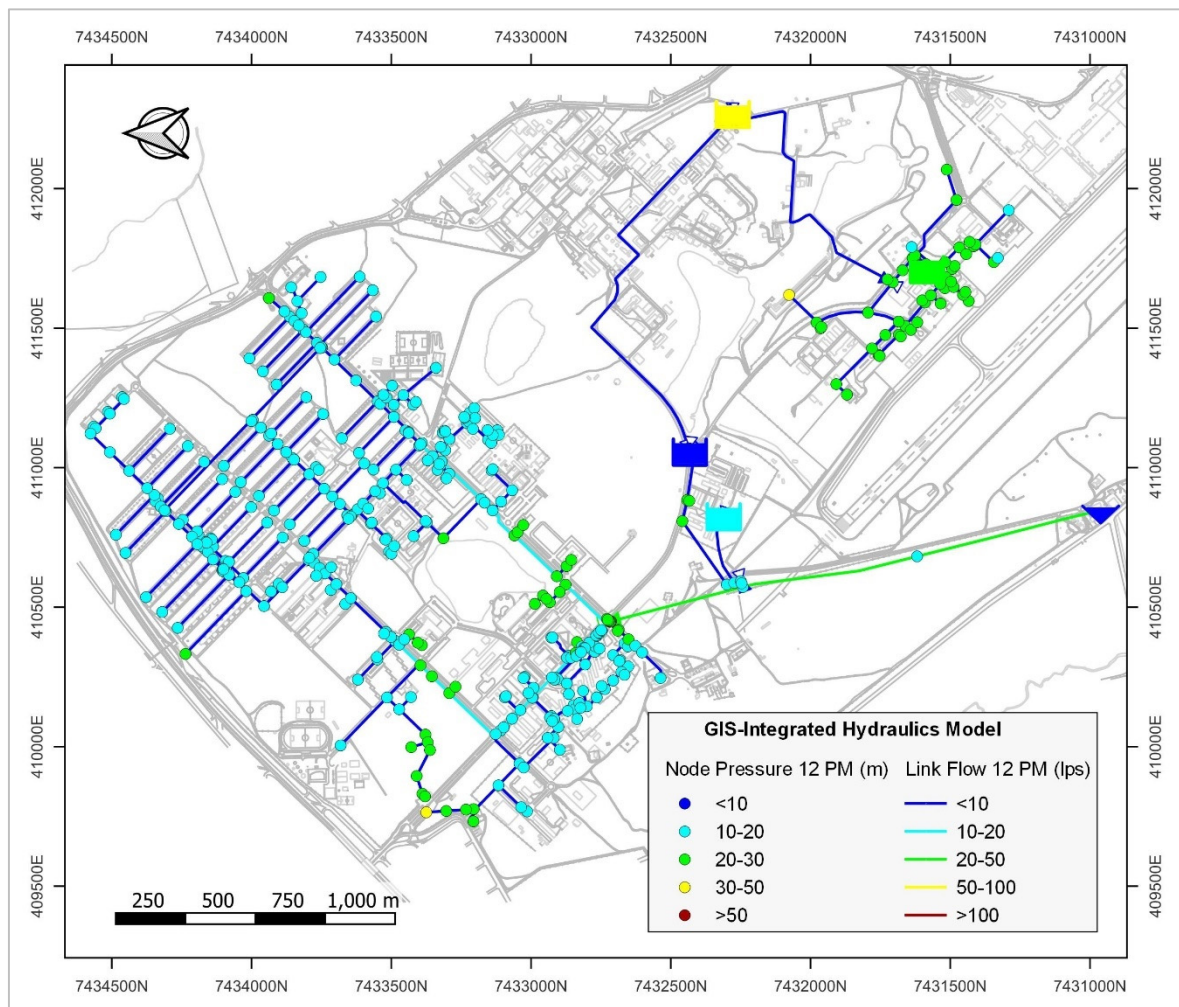

**Figure A8.** Example of the Hydraulic Model Integrated with QGIS, Pressure and Flow Results at 12 PM.

#### A.1.6. Analysis of Results

There is no universally accepted maximum deviation for the validation of the results of hydraulic modeling. The required accuracy depends on various factors, including the objective of the model, the complexity of the system, the quality and availability of the data. In general, the acceptable deviation varies between 5% and 20%, but can be lower or higher depending on the specific circumstances. For example, for the design, management or control of water quality in the system, a maximum deviation of 5% is recommended. On the other hand, for the study of the state variables of the network, such as pressure, flow and velocity, a deviation of 10% is allowed [7].

In this context, it can be stated through the analysis of the calibration results of the hydraulic model that its performance is adequate for the study's objective, obtaining the design parameters in the distribution network, as they showed a deviation of less than 10%. However, the simplification of the model limited the obtaining of hydraulic parameters in all the pipes of the distribution network, a reduction of 23% of the total extension. Therefore, as points of improvement, it is recommended the expansion of the meter park (micro-metering), the monitoring of the reservoir levels and the systematic recording of data (flow, pressure and reservoir levels), using, for example, the SCADA supervisory system, allowing the updating and optimization of the hydraulic model of this case study.

#### A.1.7. Documentation

In this document, Appendix A, there is a record of the modeling process, the results obtained, and the conclusions so that the model can be reviewed and updated in the future. It should be noted that the hydraulic model in digital format is available from the corresponding authors upon reasonable request.

#### References

1. Loucks, D.P. Water Resource Systems Models: Their Role in Planning. *J. Water Resour. Plan. Manag.* **1992**, 118, 214–223.
2. Boulos, P.F.; Jacobsen, L.B.; Heath, J.E.; Kamojjala, S.R.I. Real-time Modeling of Water Distribution Systems: A Case Study. *Journal - American Water Works Assoc.* **2014**, 106, E391–E401.
3. Rossman, L.A. EPANET 2.0-Manual Do Usuário (Tradução e Adaptação). U. S. Environ. Prot. Agency EPA Cincinnati Ohio Tradução Heber Pimentel GOMES E Moisés Menezes SALVINO Laboratório Eficiência Energética E Hidráulica Em Saneam. Universidade Fed. Paraíba UFPB **2009**.
4. Walski, T.M. Case Study: Pipe Network Model Calibration Issues. *J. Water Resour. Plan. Manag.* **1986**, 112, 238–249.
5. Shamir, U.; Howard, C.D. Engineering Analysis of Water-Distribution Systems. *J. Am. Water Works Assoc.* **1977**, 510–514.
6. Martínez, F. A., Lerma, N., & Redhisp Group. “QGISRed v.0.15” QGIS Plugin. Institute of Water and Environmental Engineering Technical University of Valencia. València, Spain. March 2022. Available: <https://Github.Com/Neslerel/QGISRed/Releases/Tag/v0.15> Date Accessed Apr 2022, 2022.
7. Lingireddy, S.; Ormsbee, L.E.; Wood, D.J. Calibration of Hydraulic Network Models. *Water Encycl.* **2005**, 14.1-14.23.
